# Supplementary material for: The influence of a biopsychosocial educational internet-based intervention on pain, dysfunction, quality of life, and pain cognition in chronic low back pain patients in primary care: a mixed methods approach
Source: Springer Nature journal article supplement (doi:10.1186/s12911-015-0220-0), 2015-11-23
Supplement: 12911_2015_220_MOESM1_ESM.pdf [file 12911_2015_220_MOESM1_ESM.pdf]

## Interview guide

|    |                                                                                                                                   |
|----|-----------------------------------------------------------------------------------------------------------------------------------|
| 1  | For how long have you had this low back pain?                                                                                     |
| 2  | Do you remember how did this pain begin?                                                                                          |
| 3  | What do you do every time you feel the pain?                                                                                      |
| 4  | Using your own words, could you tell me what have you been told about your pain?                                                  |
| 5  | What kind of treatments have you had?                                                                                             |
| 6  | Even though you have had different treatments, why do you think the pain is still there?                                          |
| 7  | What does this pain mean for you? In other words, when it hurts, why do you think it hurts?                                       |
| 8  | Do you think the health professionals who have treated you have understood your pain?                                             |
| 9  | What activities or hobbies have you stopped doing since this low back pain started?                                               |
| 10 | Why?                                                                                                                              |
| 11 | In reference to your back pain, if you could go back in time, what things would you change? What things would you do differently? |
| 12 | In what way your pain has affected your family, work, and social life?                                                            |
| 13 | What would you like to know about your pain?                                                                                      |
| 14 | If you were with the world expert on chronic low back pain, what would you ask him?                                               |
